# Supplementary material for: THAP9 Transposase Cleaves DNA via Conserved Acidic Residues in an RNaseH-Like Domain
Source: Cells. 2021 May 29;10(6):1351. doi: 10.3390/cells10061351 (PMC8230255; doi:10.3390/cells10061351)
Supplement: Supplementary file 1 [file cells-10-01351-s001.zip › cells-1197053-supplementary.pdf]

## Supplementary Information

This PDF file includes: Figures S1 to S7, Table S1

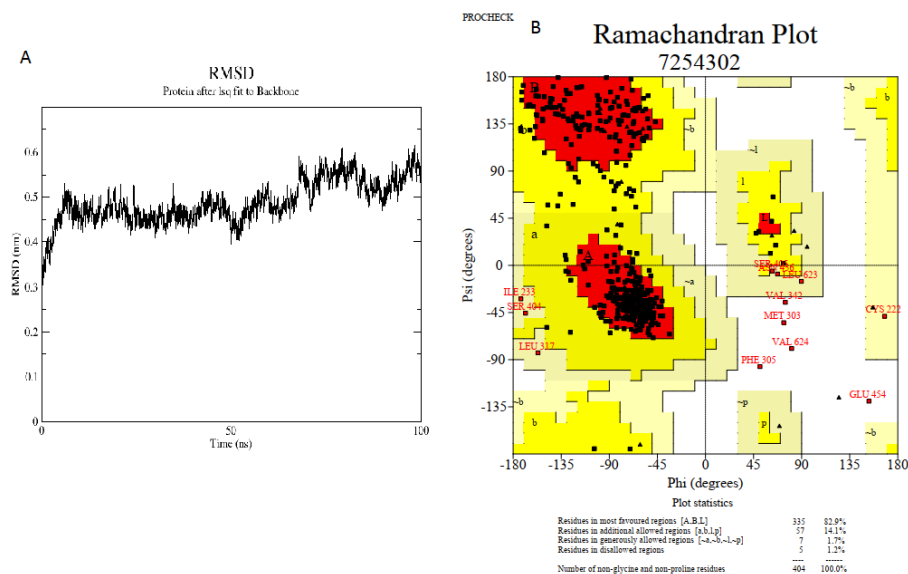

**Fig S1:** RMSD plot and Ramachandran plot for hTHAP9 model after MD simulations.

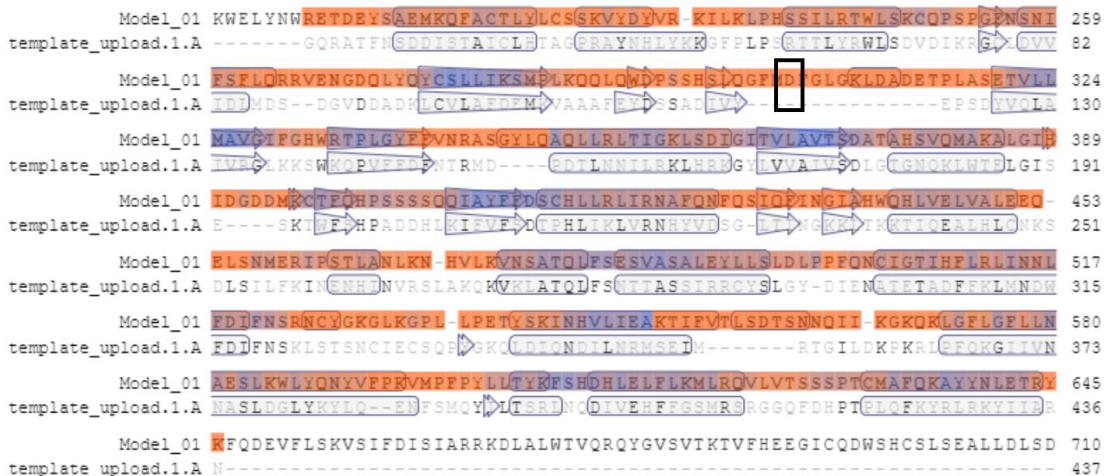

**Fig S2:** SWISS MODEL secondary structure alignment of hTHAP9 (Model\_01) homology structure built with DmTNP template (template\_upload.1.A). The residues enclosed in horizontal bars represent helical secondary structure and residues enclosed in arrows represent beta sheets. The colour of the sequence represents QMEAN, orange to blue indicates low to high quality estimate (23). D304 of hTHAP9, highlighted in black box, does not align to any structure and ends up in a loop in the final structure. Residue numbers correspond to the amino acid position in the primary sequence of the protein

| #description<br>[P1] | => | symbol | members                                      | #amino acids<br>[P1] |    |                             |
|----------------------|----|--------|----------------------------------------------|----------------------|----|-----------------------------|
| *                    | => | .      |                                              | Gg                   | => | #33cc00 #bright green       |
| A                    | => | A      | { A }                                        | Aa                   | => | #33cc00 #bright green       |
| C                    | => | C      | { C }                                        | Ii                   | => | #33cc00 #bright green       |
| D                    | => | D      | { D }                                        | Vv                   | => | #33cc00 #bright green       |
| E                    | => | E      | { E }                                        | Ll                   | => | #33cc00 #bright green       |
| F                    | => | F      | { F }                                        | Mm                   | => | #33cc00 #bright green       |
| G                    | => | G      | { G }                                        | Ff                   | => | #009900 #dark green         |
| H                    | => | H      | { H }                                        | Yy                   | => | #009900 #dark green         |
| I                    | => | I      | { I }                                        | Ww                   | => | #009900 #dark green         |
| K                    | => | K      | { K }                                        | Hh                   | => | #009900 #dark green         |
| L                    | => | L      | { L }                                        | Cc                   | => | #ffff00 #yellow             |
| M                    | => | M      | { M }                                        | Pp                   | => | #33cc00 #bright green       |
| N                    | => | N      | { N }                                        | Kk                   | => | #cc0000 #bright red         |
| P                    | => | P      | { P }                                        | Rr                   | => | #cc0000 #bright red         |
| Q                    | => | Q      | { Q }                                        | Dd                   | => | #0033ff #bright blue        |
| R                    | => | R      | { R }                                        | Ee                   | => | #0033ff #bright blue        |
| S                    | => | S      | { S }                                        | Qq                   | => | #6600cc #purple             |
| T                    | => | T      | { T }                                        | Nn                   | => | #6600cc #purple             |
| V                    | => | V      | { V }                                        | Ss                   | => | #0099ff #dull blue          |
| W                    | => | W      | { W }                                        | Tt                   | => | #0099ff #dull blue          |
| Y                    | => | Y      | { Y }                                        | Bb                   | => | #666666 #dark grey (D or N) |
| alcohol              | => | o      | { S, T }                                     | Zz                   | => | #666666 #dark grey (E or Q) |
| aliphatic            | => | l      | { I, L, V }                                  | Xx                   | => | #666666 #dark grey          |
| aromatic             | => | a      | { F, H, W, Y }                               | ?                    | => | #999999 #light grey         |
| charged              | => | c      | { D, E, H, K, R }                            | *                    | => | #666666 #dark grey          |
| hydrophobic          | => | h      | { A, C, F, G, H, I, K, L, M, R, T, V, W, Y } |                      |    |                             |
| negative             | => | -      | { D, E }                                     |                      |    |                             |
| polar                | => | p      | { C, D, E, H, K, N, Q, R, S, T }             |                      |    |                             |
| positive             | => | +      | { H, K, R }                                  |                      |    |                             |
| small                | => | s      | { A, C, D, G, N, P, S, T, V }                |                      |    |                             |
| tiny                 | => | u      | { A, G, S }                                  |                      |    |                             |
| turnlike             | => | t      | { A, C, D, E, G, H, K, N, Q, R, S, T }       |                      |    |                             |

**Fig S3:** P1 colour palette for multiple sequence alignment viewed in MView.

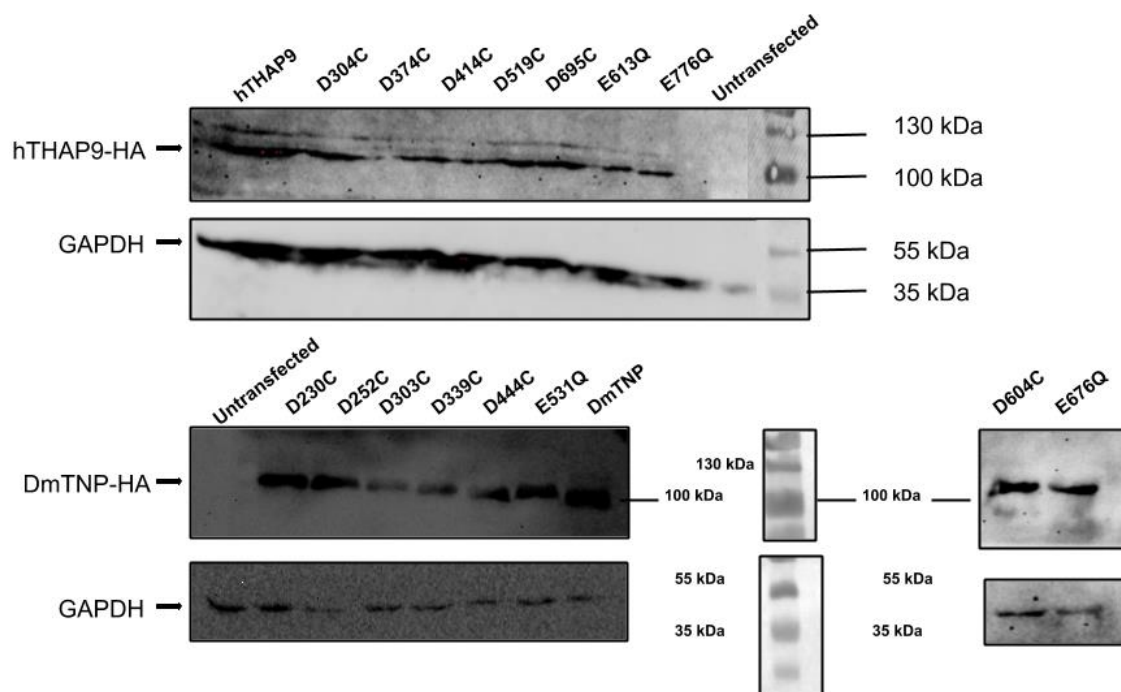

**Fig S4:** Expression levels of mutant and wild-type hTHAP9 and DmTNP (~100 kDa, C-terminal HA tagged) in the DNA excision assay as shown by western blot analysis (anti-HA). GAPDH (mol weight ~36 kDa) was used as a loading control. Negative control (HEK293 cells alone)

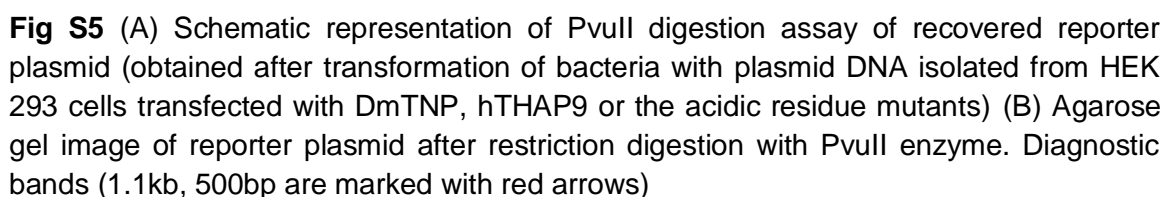

2232
8bp TSD  
ATGACCATGATTACGAATTCCCGGGGATCTGCCGCTGGACTACGTGG GTCTGGCC  
**17nt P element 5' end**      **0.6 kb**      **17nt P element 3' end**      8bp TSD  
CATGATGAAATAACATA- Pelement- TATGTTATTTTCATCATG GTCTGCC ATTCTCAT

ATGACCATGATTACG-----CACTGGCCGTCGTT  
2232 4088  
Δ 40 upstream Downstream rearrangement

3

rearrangements and extensive deletions, as observed before (16).

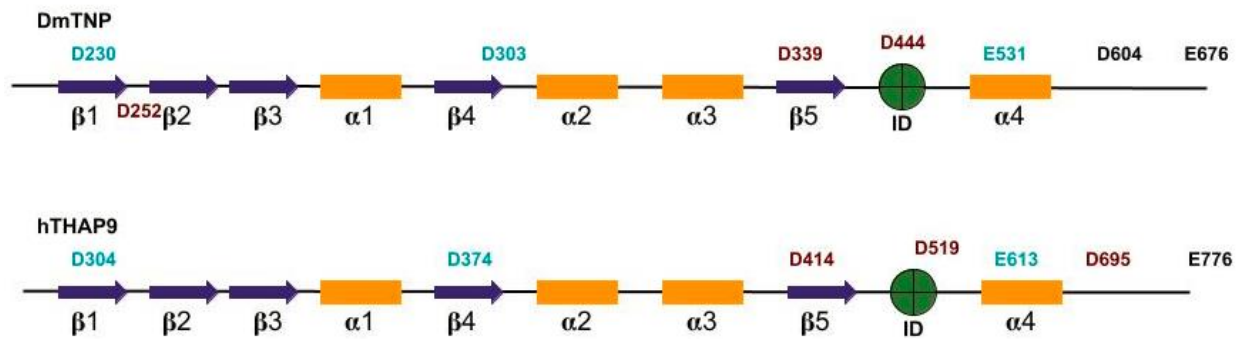

**Fig S7: Summary of catalytic mutants in *Drosophila* and human THAP9.** DDE motifs for each homolog are represented in bold (cyan) above its putative location. Other conserved residues mutated for the study are marked in black and brown (lower excision activity). Blue arrows indicate beta sheets and yellow bars represent alpha helices. Insertion domains (ID) for each homolog [DmTNP (residues 339-528) (12), hTHAP9 (residues 415-604), Pdre2 (residues 475-670)] are shown in green circles.

Table S1: Relative DNA excision and DNA integration activities observed in plasmid-based assays.

|       | Mutants  | % Relative excision activity | % Relative Integration activity |
|-------|----------|------------------------------|---------------------------------|
| DmTNP | D230C    | 12.7                         | 19                              |
|       | D252C    | 7.83                         | 31                              |
|       | D303C    | 14.02                        | 18.33                           |
|       | D339C    | 23.65                        | 76.33                           |
|       | D444C    | 0                            | 7.33                            |
|       | D604C    | 12.64                        | 63.33                           |
|       | E531Q    | 10.99                        | 3                               |
|       | E676Q    | 49.6                         | 76.66                           |
|       | WT DmTNP | 100                          | 100                             |

|               |             |        |       |
|---------------|-------------|--------|-------|
|               | pISP2-Km    | 0      | -     |
|               | Cg4-Neo     | -      | 8     |
|               | pCDNA 3.1   | -      | 0     |
|               | pBluescript | -      | 0     |
| <b>hTHAP9</b> | D304C       | 18.19  | 27    |
|               | D374C       | 26.07  | 5.5   |
|               | D414C       | 58.03  | 43.5  |
|               | D519C       | 10.26  | 14    |
|               | E613Q       | 10.26  | 7.5   |
|               | D695C       | 141.47 | 55    |
|               | E776Q       | 94.75  | 144.5 |
|               | WT hTHAP9   | 100    | 100   |
|               | pISP2-Km    | 0      | -     |
|               | pBluescript | -      | 0     |
|               | Cg4-Neo     | -      | 8     |
|               | pCDNA 3.1   | -      | 0     |
